# Supplementary material
Source: publisher figshare collection journal article supplement (https://acs.figshare.com/ndownloader/files/8835883)
Supplement: Supplementary file 1 [file 8835883]

## Supporting Information:

# Predicted Structures of the Active Sites Responsible for the Improved Reduction of Carbon Dioxide by Gold Nanoparticles

*Tao Cheng, Yufeng Huang, Hai Xiao and William A Goddard III\**

Materials and Process Simulation Center (MSC) and

Joint Center for Artificial Photosynthesis (JCAP),

California Institute of Technology, Pasadena, California 91125, United States

\* E-mail: [wag@wag.caltech.edu](mailto:wag@wag.caltech.edu)

## simulation methods

We used LAMMPS (1 Feb 2014 version)<sup>1</sup> with the USER-REAXC package and fix qeq/reax.<sup>2</sup> for the Molecular Mechanics (MM) Dynamics simulations. A Nose-Hoover thermostat was used to control the temperature with a damping parameter of 100 time steps.

To grow a gold (Au) nanoparticle (NP), we used a zigzag carbon nanotube (CNT) with a diameter of 8.39 nm as the catalysis support, which was kept fixed during all the simulations. The Embedded-atom-model (EAM)<sup>3</sup> was used to describe the interaction between Au atoms, and a Lennard-Jones (LJ) potential was used to describe the interaction between Au and the CNT. The temperature for the growth simulation was 300K, and the deposition rate for the growth simulation was  $3.0 \text{ \AA ns}^{-1}$ . The time step was 1 fs. After 35 ns of growth simulation, an Au NP with a normal thickness of about 10 nm was obtained on the CNT support. Annealing simulations were carried out to heal the defect and increase the grain size. Each annealing cycle included 10 ps cook-off simulation from 300 K to 1200 K, 5 ps NVT simulation at 1,164 K, 10 ps annealing from 1,164 K to 300 K and 15 ps NVT simulation at 300 K. After 120 annealing cycles, a fully crystallized Au NP formed on CNT support. In the annealing trajectory, the Au-NP structure after 63 annealing cycles is mostly close to the experimental structure, which was further refined by using 20 ps ReaxFF reactive force field (ReaxFF) simulation at 300K using a previous published Cu-C ReaxFF parameters.<sup>4</sup> The time step for the reactive force field (ReaxFF) simulations was 0.25 fs.

Quantum mechanics calculations were performed with VASP package<sup>5-7</sup>, using the PBE flavor<sup>8</sup> of DFT and the projector augmented wave (PAW) method<sup>9</sup> to account for core-valence interactions. The kinetic energy cutoff for plane wave expansions was set to 400 eV. The Methfessel-Paxton smearing of second order with a width of 0.2 eV was applied. The convergence criteria are  $1 \times 10^{-5}$  eV energy differences for solving the electronic wave function. All geometries (atomic coordinates) are converged to  $1 \times 10^{-2}$  eV/Å for maximal components of forces.

Cluster models for VASP calculations were cut from the simulated nanoparticle using a cut-off of 8 Å taking the selected site as a center. We consider that this provides an accuracy 0.02 eV while keeping the computational cost modest. For cluster calculations, a 20 Å cubic box was used, and only gamma point was considered in these calculations. All the Au atoms were fixed in cluster calculations.

Debyer, (freely available on <https://github.com/wojdyr/debyer>), was used to calculate the diffraction pattern for the synchrotron x-ray source. QSTEM (freely available on <http://qstem.org/>) was used to simulate the TEM images.

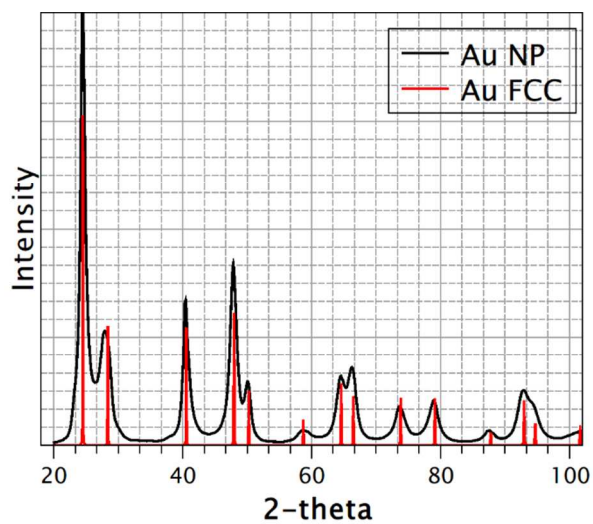

Figure S1. The simulated XRD-diffraction pattern.

The simulated XRD-diffraction pattern of Au NP shows peaks of FCC Au. The widened peak of Au NP is due to the Nano-size effect.

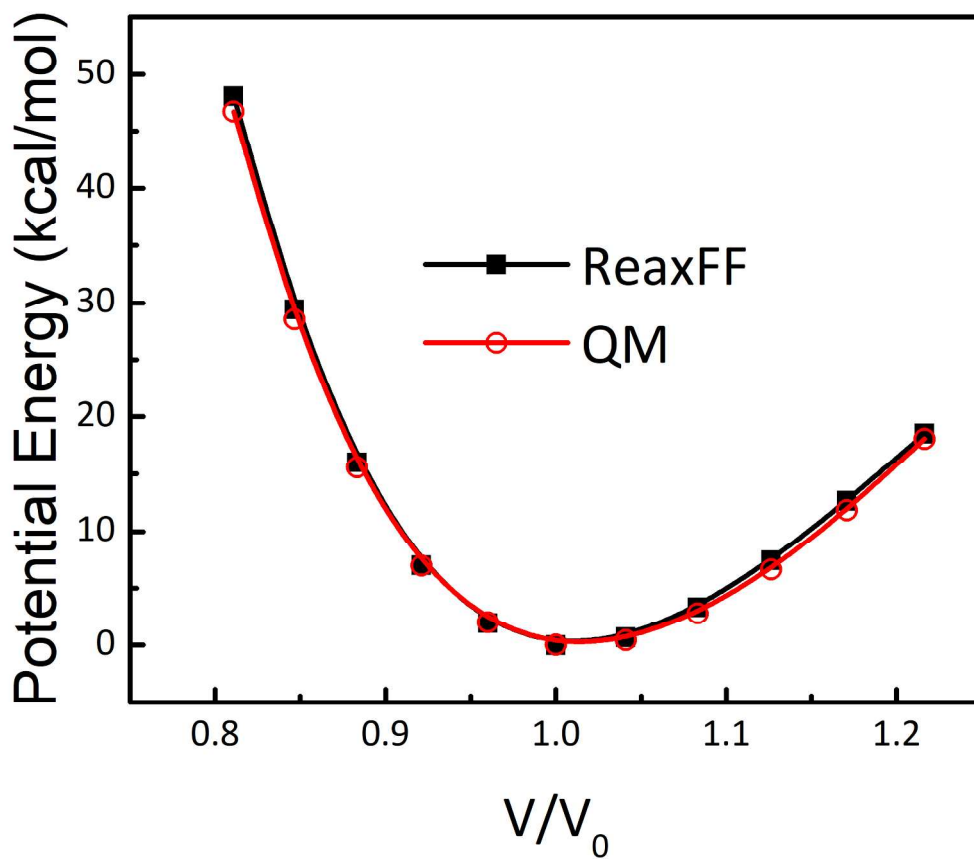

Figure S2. Comparison of the equation of state of FCC Au between ReaxFF and QM.

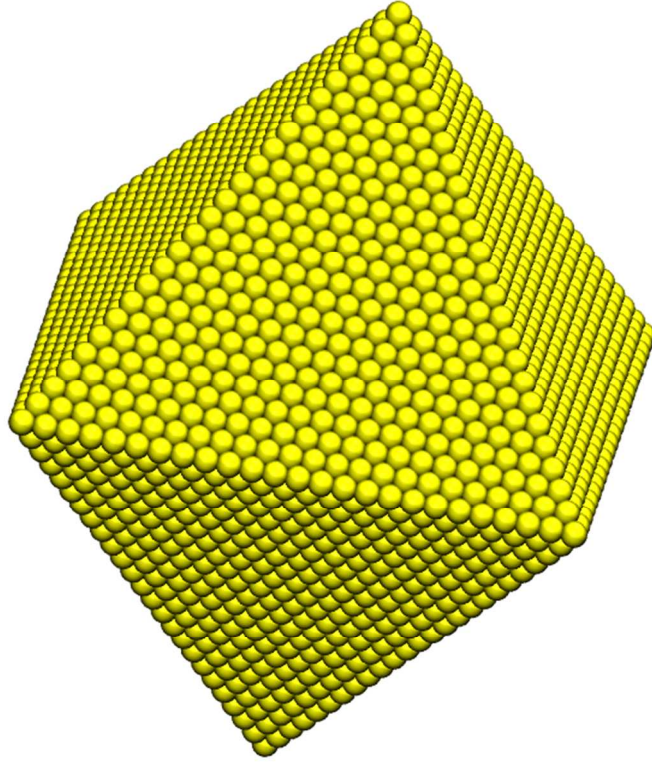

Figure S3. Au octahedral with a length of 6.93 nm (10,425 Au atoms), which consists of 2,024 facet sites (87.77%), 276 edge sites (11.97%) and six corner sites (0.26%).

2017-06-25 16:33:21 : C|Au

```
39
50.0000
 9.5469
26.5405
 1.5105
 6.6630
 0.0000
 1.0588
 4.6000
12.1176
13.3056
-70.1292
 0.0000
10.0000
 0.0000
33.8667
 6.0891
 1.0563
 2.0384
 6.1431
 6.9290
 0.3989
 3.9954
 0.0000
 5.7796
10.0000
 1.9487
 0.0000
 2.1645
 1.5591
 0.1000
 2.1365
 0.6991
50.0000
 1.8512
 0.0000
 0.0000
 0.0000
 0.0000
 2.6962
2      ! Nr of atoms; cov.r; valency;a.m;Rvdw;Evdw;gammaEEM;cov.r2;#
      alfa;gammavdW;valency;Eunder;Eover;chiEEM;etaEEM;n.u.
      cov r3;Elp;Heat inc.;n.u.;n.u.;n.u.;n.u.
      ov/un;vall;n.u.;val3,vval4
C      1.3825   4.0000  12.0000   1.9133   0.1853   0.9000   1.1359
4.0000
      9.7602   2.1346   4.0000  33.2433  79.5548   5.8678   7.0000
0.0000
      1.2104   0.0000 199.0303   8.6991  34.7289  13.3894   0.8563
0.0000
      -2.8983   2.5000   1.0564   4.0000   2.9663   0.0000   0.0000
0.0000
```

```

Au    2.0271    1.0000 196.9665    2.2078    0.3446    0.5126   -1.0000
1.0000
    11.9754    2.0434    1.0000    0.0000    0.0000    1.0082    8.9305
0.0000
    -1.0000    0.0000   92.5070    6.2293    5.2294    0.1542    0.8563
0.0000
    -24.7561    2.9867    1.0338    6.2998    2.5791    0.0000    0.0000
0.0000
3      ! Nr of bonds; Edis1;LPpen;n.u.;pbe1;pbo5;l3corr;pbo6
      pbe2;pbo3;pbo4;n.u.;pbo1;pbo2;ovcorr
1 1 156.5953 100.0397 80.0000 -0.8157 -0.4591 1.0000 37.7369
0.4235
      0.4527 -0.1000 9.2605 1.0000 -0.0750 6.8316 1.0000
0.0000
1 2 66.7504 0.0000 0.0000 0.3297 -0.2000 0.0000 16.0000
0.1769
      0.1314 -0.2000 15.0000 1.0000 -0.1324 5.9552 0.0000
0.0000
2 2 146.6542 0.0000 0.0000 -0.0295 -0.2000 0.0000 16.0000
0.3319
      0.2793 -0.2000 15.0000 1.0000 -0.1591 5.3892 0.0000
0.0000
1      ! Nr of off-diagonal terms; Ediss;Ro;gamma;rsigma;rpi;rpi2
1 2 0.0673 1.9638 9.9501 1.9677 -1.0000 -1.0000
4      ! Nr of angles;at1;at2;at3;Thetao,o;ka;kb;pv1;pv2
1 1 1 67.2326 22.0695 1.6286 0.0000 1.7959 15.4141 1.8089
1 1 2 58.3918 13.9641 2.0300 0.0000 1.2404 0.0000 2.2787
1 2 1 71.3861 3.9232 2.1478 0.0000 1.1259 0.0000 2.1341
1 2 2 20.0000 7.2189 1.6647 0.0000 0.9966 0.0000 1.2857
1      ! Nr of torsions;at1;at2;at3;at4;;V1;V2;V3;V2(BO);vconj;n.u;n
1 1 1 1 -0.2500 11.5822 0.1879 -4.7057 -2.2047 0.0000
0.0000
0      ! Nr of hydrogen bonds;at1;at2;at3;Rhb;Dehb;vhb1

```

## References

- (1) Plimpton, S. Fast Parallel Algorithms for Short-Range Molecular Dynamics. *J. Comput. Phys.* **1995**, *117*, 1-19.
- (2) Aktulga, H. M.; Fogarty, J. C.; Pandit, S. A.; Grama, A. Y. Parallel Reactive Molecular Dynamics: Numerical Methods and Algorithmic Techniques. *Parallel Comput* **2012**, *38*, 245-259.
- (3) Foiles, S. M.; Baskes, M. I.; Daw, M. S. Embedded-Atom-Method Functions for the FCC Metals Cu, Ag, Au, Ni, Pd, Pt, and Their Alloys. *Phys. Rev. B: Condens. Matter Mater. Phys.* **1986**, *33*, 7983-7991.
- (4) Järvi, T. T.; van Duin, A. C. T.; Nordlund, K.; Goddard, W. A. Development of Interatomic Reaxff Potentials for Au-S-C-H Systems. *J. Phys. Chem. A* **2011**, *115*, 10315-10322.
- (5) Kresse, G.; Hafner, J. Ab Initio Molecular Dynamics for Liquid Metals. *Phys. Rev. B: Condens. Matter Mater. Phys.* **1993**, *47*, 558-561.
- (6) Kresse, G.; Furthmüller, J. Efficiency of Ab-Initio Total Energy Calculations for Metals and Semiconductors Using a Plane-Wave Basis Set. *Comput. Mater. Sci.* **1996**, *6*, 15-50.
- (7) Kresse, G.; Furthmüller, J. Efficient Iterative Schemes for Ab Initio Total-Energy Calculations Using a Plane-Wave Basis Set. *Phys. Rev. B: Condens. Matter Mater. Phys.* **1996**, *54*, 11169-11186.
- (8) Perdew, J. P.; Burke, K.; Ernzerhof, M. Generalized Gradient Approximation Made Simple. *Phys. Rev. Lett.* **1996**, *77*, 3865-3868.
- (9) Kresse, G.; Joubert, D. From Ultrasoft Pseudopotentials to the Projector Augmented-Wave Method. *Phys. Rev. B: Condens. Matter Mater. Phys.* **1999**, *59*, 1758-1775.
